# Supplementary material for: Neuroinflammation in Low-Level PM2.5-Exposed Rats Illustrated by PET via an Improved Automated Produced [18F]FEPPA: A Feasibility Study
Source: Hindawi journal article supplement (doi:10.1155/2022/1076444), 2022-01-01

## **SUPPLEMENTARY DATA**

Neuroinflammation in Low-level PM2.5 Exposed Rats Illustrated by PET via An Improved Automated Produced [<sup>18</sup>F]FEPPA – A Feasibility Study

Mei-Fang Cheng<sup>1,2</sup>, Tsun-Jen Cheng<sup>2</sup>, Yue Leon Guo<sup>2</sup>, Ching-Hung Chiu<sup>1</sup>, Hung-Ming Wu<sup>3</sup>, Ruoh-Fang Yen<sup>1,4</sup>, Ya-Yao Huang\*<sup>1, 4-5</sup>, Wen-Sheng Huang\*<sup>6-8</sup>, Chyng-Yann Shiue\*<sup>1,4,9</sup>

<sup>1</sup>Department of Nuclear Medicine, National Taiwan University Hospital, Taipei, Taiwan

<sup>2</sup>Institute of Environmental and Occupational Health Sciences, National Taiwan University, Taipei, Taiwan

<sup>3</sup>Department of Neurology, Changhua Christian Hospital, Taiwan

<sup>4</sup>Molecular Imaging Center, National Taiwan University, Taipei, Taiwan

<sup>5</sup>Institute of Medical Device and Imaging, National Taiwan University College of Medicine, Taipei, Taiwan

<sup>6</sup>Department of Nuclear Medicine, Taipei Veterans General Hospital, Taipei, Taiwan

<sup>7</sup>Department of Nuclear Medicine, Taipei Medical University Hospital, Taipei, Taiwan

<sup>8</sup>Department of Nuclear Medicine, Cheng-Hsin General Hospital, Taipei, Taiwan

<sup>9</sup>PET Center, Department of Nuclear Medicine, Tri-Service General Hospital, Taiwan

## Automated radiosynthesis

The synthesis was carried out with a modified TRACERlab  $\text{FxFN}$  module (GE Healthcare, Milwaukee, WI) in which V14 was connected to a fluid sensor for direct injection of reaction mixture to semi-preparative HPLC, V18 was connected to a product vial for direct transfer of collected product to the product vial, and V16 was connected to a Sep-Pak<sup>®</sup> Alumina-N Plus Long cartridge and 0.22  $\mu\text{m}$  PTFE sterilizing filter (Millipore, Madrid, Spain) in series to a sterile vial.

Prior to delivery of [ $^{18}\text{F}$ ]Fluoride to the modified TRACERLab  $\text{FxFN}$  module, each vial was filled with the appropriate solvent and reagent.

Vial 1:  $\text{K}_2\text{CO}_3$  (4.7 mg) in 0.2 mL of water and Kryptofix  $_{2.2.2}$  ( $\text{K}_{2.2.2}$ , 14.7 mg) in 0.2 mL of acetonitrile (MeCN).

Vial 2: MeCN (1.0 mL).

Vial 3: Precursor (**1**, 5 mg) in 1.0 mL of anhydrous MeCN.

Vial 4: Water for injection (2.5 mL).

Product vial: Water for injection (1mL).

The automated synthesis module was operated in the following sequences:

1. At the end of bombardment, aqueous [ $^{18}\text{F}$ ]Fluoride in 1.4 mL of [ $^{18}\text{O}$ ]O<sub>2</sub>H, produced in our PET Trace cyclotron (GE Medical Systems, Uppsala, Sweden) via an  $^{18}\text{O}(\text{p}, \text{n})^{18}\text{F}$  nuclear reaction, was transferred from the target into a [ $^{18}\text{O}$ ]O<sub>2</sub>H collection vial with helium purge.

2. Opened V10 and V23. Aqueous [ $^{18}\text{F}$ ]Fluoride was passed through a Sep-Pak<sup>®</sup> QMA Plus Light cartridge and V11 under vacuum. [ $^{18}\text{O}$ ]O<sub>2</sub>H was recovered in the [ $^{18}\text{O}$ ]O<sub>2</sub>H recovery vial and the [ $^{18}\text{F}$ ]Fluoride was trapped on a Sep-Pak<sup>®</sup> QMA Plus Light cartridge.
3. Opened V1, V13, and V24. K<sub>2</sub>CO<sub>3</sub>/K<sub>2.2.2</sub> solution in Vial 1 was passed through V1, V10, QMA, V11, and V13. [ $^{18}\text{F}$ ]Fluoride was collected in Reaction Vessel.
4. Closed V1, V13 and V14. Opened V20 and V24, and evaporated the solution in Reaction Vessel at 110<sup>0</sup>C for 2.5 min under a stream of helium from V20.
5. Flushed the solution in Vial 2 into the Reaction Vessel with helium. Closed V2, V13, and V14. Opened V20 and V24, and performed azeotropic distillation of the remaining H<sub>2</sub>O at 110<sup>0</sup>C for 2.5 min with a stream of helium from V20.
6. Cooled the Reaction Vessel to 40<sup>0</sup>C and then flushed the solution in Vial 3 into the Reaction Vessel with helium. Closed V3, V13, V14, V20, and V24. Heated the solution at 70<sup>0</sup>C for 20 min.
7. Flushed the solution in Vial 4 into the Reaction Vessel with helium. Closed V4, V13, V14, V20, and V24. Stirred the solution at 30<sup>0</sup>C for 15 sec.
8. Opened V14. Injected the reaction mixture in the Reaction Vessel into semi-preparative HPLC (Waters Xterra RP-18, 10 μm, 10×250 mm, 35% aqueous ethanol in water for injection, 4 mL/min) with a stream of helium from V20.
9. At about 25 min post-injection, the [ $^{18}\text{F}$ ]FEPPA peak was collected for about

2 min and the solution was transferred through V18 into the product vial, which contained 1 mL water for injection.

10. Opened V16 and flushed the [<sup>18</sup>F]FEPPA solution in the product vial through an Alumina-N cartridge and a 0.2 μm PTFE sterile filter into a sterile multi-injection vial with a stream of helium from V22.

11. The [<sup>18</sup>F]FEPPA solution was diluted with saline to provide the [<sup>18</sup>F]FEPPA (**2**) with <10% of EtOH concentration for PET imaging of the effects of PM2.5 in rats.

### **Quality Control (QC) and Stability Tests of the [<sup>18</sup>F]FEPPA (**2**)**

Other items of QC test and corresponding criteria of **2** were set based on the U.S. Pharmacopoeia (USP) for radiopharmaceuticals[73], which included visual inspection, pH, half-life of radionuclide, radionuclidic purity, radiochemical purity, chemical purity, residual K<sub>2.2.2</sub>, residual solvents, bacterial endotoxins, filter integrity, and sterility test.

The radioactivity was determined using a calibrated ion chamber (CRC-15R, Capintec Inc, USA).

The radionuclidic purity was determined using a gamma spectrometry system (3 x 3 in. NaI detector) and a multi-channel analyzer (Raytest, Straubenhardt, Germany).

The residual organic solvents in **2** were analyzed by GC equipped with a flame ionization detector (FID) and an Agilent Column (HP Fast Residual Solvent chromatography column (30 m×0.53 mm×1μm). Nitrogen was used as a carrier gas with a flow rate of 2 mL/min. The split/splitless injector was set at 20:1. The initial oven temperature was kept at 40°C for 1 min followed by an increase of temperature at 14°C/min to 110°C and then at 30°C/min to 125°C. The oven

temperature was kept at 125°C for 2.5 min, followed by an increase of temperature at 47.5°C/min to 220°C and kept at that temperature for 4 min. Hydrogen and air, at 35 and 250 mL/min, respectively, were used in the GC/FID, with nitrogen (25 mL/min) as a make-up gas. The software, Gina Star (Raytest, Straubenhardt, Germany), was used for data acquisition.

Measurement of bacterial endotoxins was carried out using a Limulus amoebocyte lysate (LAL) test and a sterility test was performed with the proven method meeting the requirement of USP.

The quality of **2** synthesized by this method met the USP criteria. The appearance of **2** was clear, the HPLC retention time of **2** was approximately 6.5 min, the radiochemical purity of **2** was greater than 95% (**Figure S1A**), and the concentration of residual solvents in **2** were EtOH < 10%, Acetone < 0.5%, and MeCN < 0.04% (**Table 1**). The residual [<sup>18</sup>F]Fluoride in **2** was also assessed by radio-TLC. The retardation factor ( $R_f$ ) values of [<sup>18</sup>F]Fluoride and **2** were approximately 0.0 and 0.4, respectively (**Figure S1B**), and the concentration of [<sup>18</sup>F]Fluoride in **2** was less than 5%. The chemical identity of [<sup>18</sup>F]FEPPA (**2**) was confirmed by co-injection with a non-radioactive authentic FEPPA (**Figure S1A**). The retention time ( $R_t$ ) of **2** was 6.7 min.

**Figure S1.** Representative analytical HPLC (A) and radio-TLC chromatograms (B) of the  $[^{18}\text{F}]\text{FEPPA}$  (2).

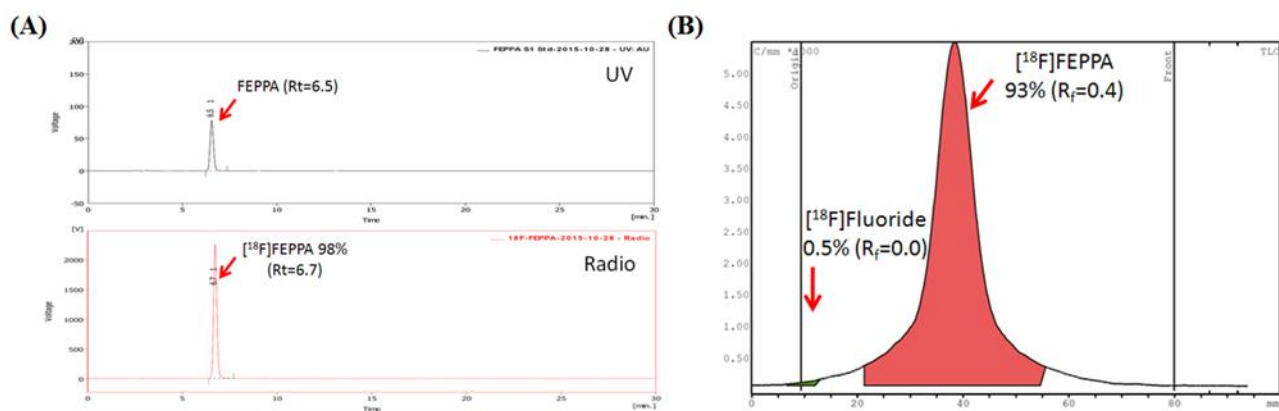

## Method Development of semi-preparative HPLC purification of the $[^{18}\text{F}]\text{FEPPA}$ (2) in this study

The HPLC purification conditions of **2** have been optimized by using a Waters Xterra RP-18 column (10  $\mu\text{m}$ , 10 x 25 mm) and eluting with different flow rates (2~4 ml/min) and different concentrations (35~50%) of aqueous ethanol as mobile phase.

**Figure S2.** Condition optimization for semi-preparative HPLC purification of the  $[^{18}\text{F}]\text{FEPPA}$  (2) (Waters Xterra RP-18, 10  $\mu\text{m}$ , 10 $\times$ 250 mm) using same flow rate (4 mL/min) but different concentrations of aqueous ethanol as mobile phase .

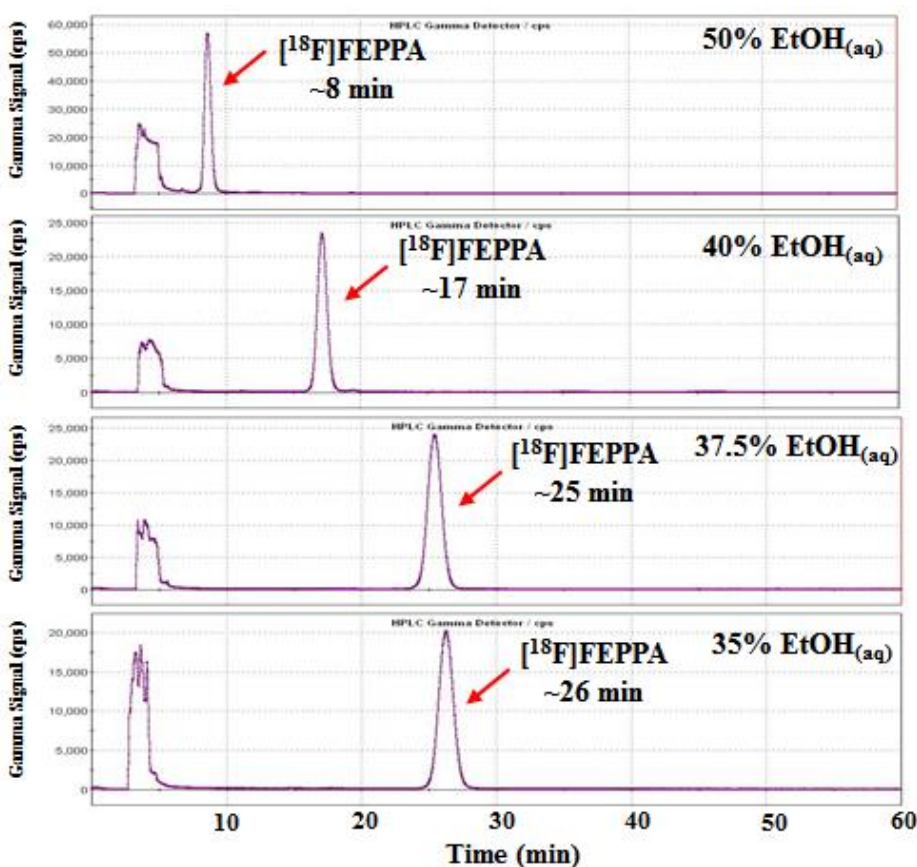

**Figure S3.** Representative semi-preparative HPLC purification chromatogram of the [ $^{18}\text{F}$ ]FEPPA (**2**) when 40% EtOH of mobile phase was used in semi-preparative HPLC purification.

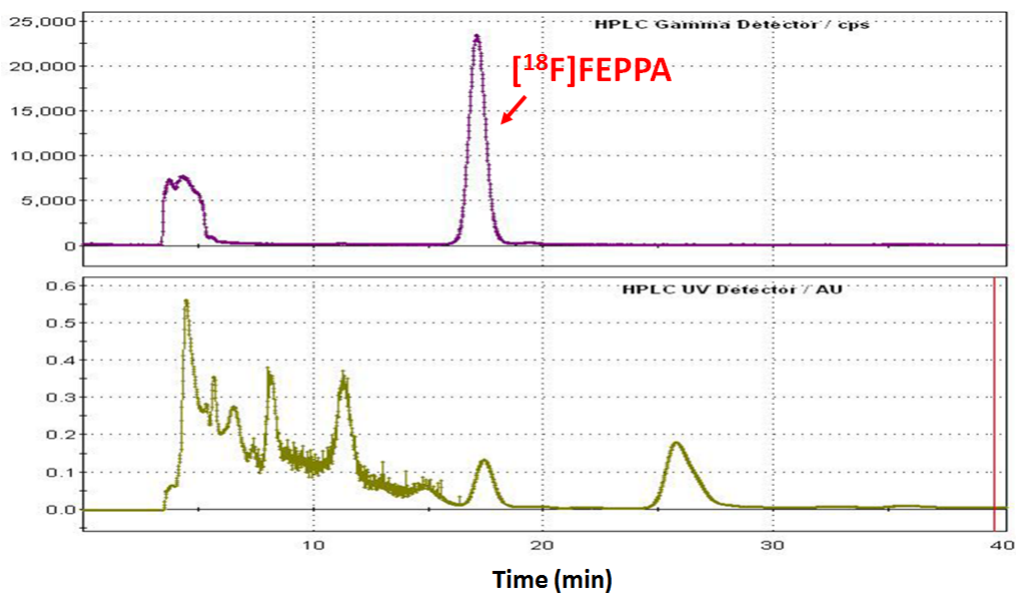

Supplement: f1 [file 1076444.f1.pdf]
